# Supplementary material
Source: PubMed Central journal article supplement (PMC4059610)
Supplement: NIHMS559691-supplement-01.pdf [file NIHMS559691-supplement-01.pdf]

Table S1. Crystallography Data Collection and Refinement Statistics, Related to Figure 2

|                                                     | WRC/WIRS seleno <sup>*</sup>                  |
|-----------------------------------------------------|-----------------------------------------------|
| <b>Data collection</b>                              |                                               |
| Space group                                         | P2 <sub>1</sub> 2 <sub>1</sub> 2 <sub>1</sub> |
| Cell dimensions                                     |                                               |
| <i>a</i> , <i>b</i> , <i>c</i> (Å)                  | 97.49, 114.75, 323.61                         |
| $\alpha$ , $\beta$ , $\gamma$ (°)                   | 90, 90, 90                                    |
| Resolution (Å)                                      | 50-2.43 (2.48-2.43) <sup>#</sup>              |
| <i>R</i> <sub>merge</sub>                           | 0.086 (0.54)                                  |
| <i>I</i> / $\sigma I$                               | 26 (1.84)                                     |
| Completeness (%)                                    | 99.6 (98.8)                                   |
| Redundancy                                          | 6.3 (4.4)                                     |
| <b>Refinement</b>                                   |                                               |
| Resolution (Å)                                      | 19.98-2.43                                    |
| No. reflections                                     | 262,551                                       |
| <i>R</i> <sub>work</sub> / <i>R</i> <sub>free</sub> | 18.4% / 20.9%                                 |
| No. nonhydrogen atoms                               |                                               |
| Protein                                             | 22,013                                        |
| Water                                               | 746                                           |
| B-factors                                           |                                               |
| Protein                                             | 60.4                                          |
| Water                                               | 53.6                                          |
| R.m.s. deviations                                   |                                               |
| Bond lengths (Å)                                    | 0.002                                         |
| Bond angles (°)                                     | 0.589                                         |

\*One crystal was used for the data collection.

<sup>#</sup>Values in parentheses are for the highest resolution shell.

Table S3. DNA Constructs and Peptides Used in This Study, Related to the Experimental Procedures

| Construct name                            | Description*                                                       | Source or reference   |
|-------------------------------------------|--------------------------------------------------------------------|-----------------------|
| Sra1                                      | His6-Tev-hSra1 (1-1253, full length), His6-Tev finally removed     | (Ismail et al., 2009) |
| Nap1                                      | His6-Tev-hNap1 (1-1128, full length), His6-Tev finally removed     | (Ismail et al., 2009) |
| ΔWAVE1                                    | MBP-Tev-hWAVE1 (1-178), MBP-Tev finally removed                    | (Ismail et al., 2009) |
| miniWAVE1                                 | MBP-Tev-hWAVE1 [(1-186)-(GGG)6-(485-559)], MBP-Tev finally removed | (Chen et al., 2010)   |
| WAVE1-H6-FL <sup>#1,2</sup>               | MBP-Tev-hWAVE1 [(1-452)-HHHHHH-(457-559)], MBP-Tev finally removed | This study            |
| VCA                                       | hWAVE1(485-559)                                                    | (Ismail et al., 2009) |
| WAVE1 <sub>217</sub> <sup>#2</sup>        | MBP-Tev-hWAVE1 [(1-217)-(GGG)6-(485-559)], MBP-Tev finally removed | This study            |
| ΔAbi2                                     | MBP-Tev-hAbi2 (1-158), MBP-Tev finally removed                     | (Ismail et al., 2009) |
| HSPC300                                   | MBP-Tev-hHSPC300 (1-79) (Full length), MBP-Tev finally removed     | (Ismail et al., 2009) |
| 2MBP-HSPC300                              | MBP-MBP-hHSPC300 (1-79) (Full length)                              | This study            |
| 2MBP-ΔWRC                                 | Sra1 + Nap1 + ΔWAVE1 + ΔAbi2 + 2MBP-HSPC300                        | This study            |
| 2MBP-ΔWRC <sub>Y923A</sub> <sup>#3</sup>  | Sra1 (Y923A) + Nap1 + ΔWAVE1 + ΔAbi2 + 2MBP-HSPC300                | This study            |
| 2MBP-ΔWRC <sub>L1090A</sub> <sup>#3</sup> | Sra1 (L1090A) + Nap1 + ΔWAVE1 + ΔAbi2 + 2MBP-HSPC300               | This study            |
| 2MBP-ΔWRC <sub>E1084A</sub> <sup>#3</sup> | Sra1 (E1084A) + Nap1 + ΔWAVE1 + ΔAbi2 + 2MBP-HSPC300               | This study            |
| 2MBP-ΔWRC <sub>R106A</sub> <sup>#3</sup>  | Sra1 + Nap1 + ΔWAVE1 + ΔAbi2 (R106A) + 2MBP-HSPC300                | This study            |
| 2MBP-ΔWRC <sub>R106M</sub> <sup>#3</sup>  | Sra1 + Nap1 + ΔWAVE1 + ΔAbi2 (R106M) + 2MBP-HSPC300                | This study            |
| 2MBP-ΔWRC <sub>R107A</sub> <sup>#3</sup>  | Sra1 + Nap1 + ΔWAVE1 + ΔAbi2 (R107A) + 2MBP-HSPC300                | This study            |
| 2MBP-ΔWRC <sub>G110W</sub> <sup>#3</sup>  | Sra1 + Nap1 + ΔWAVE1 + ΔAbi2 (G110W) + 2MBP-HSPC300                | This study            |
| 2MBP-ΔWRC <sub>AW</sub> <sup>#3</sup>     | Sra1 + Nap1 + ΔWAVE1 + ΔAbi2 (R106A/G110W) + 2MBP-HSPC300          | This study            |
| miniWRC                                   | Sra1 + Nap1 + miniWAVE1 + ΔAbi2 + HSPC300                          | (Chen et al., 2010)   |
| 2MBP-miniWRC                              | Sra1 + Nap1 + miniWAVE1 + ΔAbi2 + 2MBP-HSPC300                     | This study            |
| WRC217                                    | Sra1 + Nap1 + WAVE1 <sub>217</sub> + ΔAbi2 + HSPC300               | This study            |
| FL-WRC                                    | Sra1 + Nap1 + WAVE1-H6-FL + ΔAbi2 + HSPC300                        | This study            |
| dSra                                      | His6-Tev-dSra (1-1291) (Full length), His6-Tev finally removed     | (Ismail et al., 2009) |
| dNap                                      | His6-Tev-dNap (1-1126) (Full length), His6-Tev finally removed     | (Ismail et al., 2009) |
| dΔWAVE                                    | MBP-Tev-dWAVE1 (1-181), MBP-Tev finally removed                    | (Ismail et al., 2009) |
| dΔAbi                                     | MBP-Tev-dAbi (1-170), MBP-Tev finally removed                      | (Ismail et al., 2009) |
| 2MBP-dHSPC300                             | MBP-MBP-dHSPC300 (1-76) (Full length)                              | (Ismail et al., 2009) |
| 2MBP-dΔWRC                                | dSra + dNap + dΔWAVE + dΔAbi + 2MBP-dHSPC300                       | This study            |

|                                                          |                                                                                                                                                                                                                                                                                                                                                                                                                                                                |                                        |
|----------------------------------------------------------|----------------------------------------------------------------------------------------------------------------------------------------------------------------------------------------------------------------------------------------------------------------------------------------------------------------------------------------------------------------------------------------------------------------------------------------------------------------|----------------------------------------|
| 2MBP-dΔWRC <sub>AW</sub> <sup>#2</sup>                   | dSra + dNap + dΔWAVE + dΔAbi (R118A/G122W) + 2MBP-dHSPC300                                                                                                                                                                                                                                                                                                                                                                                                     | This study                             |
| Rac1                                                     | hRac1 Q61L full length                                                                                                                                                                                                                                                                                                                                                                                                                                         | (Prigmore et al., 1995)                |
| GST-Rac1                                                 | GST-Tev-hRac1 Q61L full length                                                                                                                                                                                                                                                                                                                                                                                                                                 | (Prigmore et al., 1995)                |
| GST-PCDH10 WIRS                                          | GST-Tev-MERSFSTFGKE                                                                                                                                                                                                                                                                                                                                                                                                                                            | This study                             |
| GST-PCDH10 WIRS <sub>T1002A</sub>                        | GST-Tev-MERSFSAFGKE                                                                                                                                                                                                                                                                                                                                                                                                                                            | This study                             |
| WIRS peptide                                             | WGAERSFSTFGKEKA                                                                                                                                                                                                                                                                                                                                                                                                                                                | Synthesized (Abgent)                   |
| WIRS 2Ala peptide                                        | WGAERSFSAAGKEKA                                                                                                                                                                                                                                                                                                                                                                                                                                                | Synthesized (Abgent)                   |
| FITC-WIRS peptide                                        | FITC-GAERSFSTFGKEKA                                                                                                                                                                                                                                                                                                                                                                                                                                            | Synthesized (UTSW)                     |
| Seleno-WIRS peptide                                      | WGAERSM*STFGKEKA (M* = selenomethionine)                                                                                                                                                                                                                                                                                                                                                                                                                       | Synthesized (Abgent)                   |
| Peptide A                                                | AVEYSDSEDDSEFDEVDWLE                                                                                                                                                                                                                                                                                                                                                                                                                                           | Synthesized (UTSW)                     |
| GST-PCDH10 CT                                            | GST-Tev-mPCDH10 (778-1040)                                                                                                                                                                                                                                                                                                                                                                                                                                     | Openbiosystems (BU511004)              |
| GST-PCDH10 CT with point mutations in WIRS <sup>#4</sup> | GST-PCDH10 CT with single point mutations E997A or R998A or S999(A, G, H P) or F1000(A, M, W, Y, S, G, T, N, P, E, V, K) or S1001(A, D, F, K, L, H, G, P) or T1002(A, S, V, G, C) or F1003(A, W, H, Y) or G1004(A, V, L, E, H) or K1005(A, G, R, M, F, E) or E1006A; or with multiple point mutations, with 997ERSFSTFGKE1006 replaced by 997AAAFATFGKA1006, or 997AAAFATFAKA1006, or 997AAAFATFGAA1006, or 997AAAFATFAAA1006, or 3Ala (F1000A/T1002A/F1003A). | This study                             |
| GST-PCDH10 (ΔCM1, ΔCM2) <sup>#2</sup>                    | GST-Tev-mPCDH10 [(778-906)-GGSEGGGSEGGSTGATSG-(925-939)-ASGSGGGSEGGSEGATS-(957-1040)]                                                                                                                                                                                                                                                                                                                                                                          | This study                             |
| GST-PCDH10 CT <sub>short</sub>                           | GST-Tev-mPCDH10 (879-1040)                                                                                                                                                                                                                                                                                                                                                                                                                                     | This study                             |
| GST-hPCDH10 CT                                           | GST-Tev-hPCDH10 (879-1040)                                                                                                                                                                                                                                                                                                                                                                                                                                     | Openbiosystems (BC111560)              |
| GST-hPCDH10 CT <sub>short</sub> AA <sup>#3</sup>         | GST-Tev-hPCDH10 (879-1040), T1002A/F1003A                                                                                                                                                                                                                                                                                                                                                                                                                      | This study                             |
| GST-PCDH17 CT                                            | GST-Tev-hPCDH17 (857-1159)                                                                                                                                                                                                                                                                                                                                                                                                                                     | Openbiosystems (BC028165)              |
| GST-PCDH17 CT AA <sup>#3</sup>                           | GST-Tev-hPCDH17 (857-1159), T1000A/F1001A                                                                                                                                                                                                                                                                                                                                                                                                                      | This study                             |
| GST-PCDH18 CT                                            | GST-Tev-hPCDH18 (861-1135)                                                                                                                                                                                                                                                                                                                                                                                                                                     | Openbiosystems (BC093815)              |
| GST-PCDH19 CT                                            | GST-Tev-mPCDH19 (875-1145)                                                                                                                                                                                                                                                                                                                                                                                                                                     | Openbiosystems (BC118529)              |
| GST-PCDH12 CT                                            | GST-Tev-hPCDH12 (960-1184)                                                                                                                                                                                                                                                                                                                                                                                                                                     | Openbiosystems (BC052973)              |
| GST-PCDHα6 CT                                            | GST-Tev-hPCDHα6 (728-919)                                                                                                                                                                                                                                                                                                                                                                                                                                      | Openbiosystems (BC036674)              |
| GST-PCDH8 CT                                             | GST-Tev-hPCDH8 (915-1070)                                                                                                                                                                                                                                                                                                                                                                                                                                      | Openbiosystems (BC036025)              |
| GST-FAT1 CT                                              | GST-Tev-mFAT1 (4215-4436)                                                                                                                                                                                                                                                                                                                                                                                                                                      | Openbiosystems (BC049872)              |
| GST-FAT3 CT <sup>#5</sup>                                | GST-Tev-mFAT3 (4185-4401)                                                                                                                                                                                                                                                                                                                                                                                                                                      | Openbiosystems (CA318408)              |
| GST-FAT3 CT <sub>mh</sub> <sup>#6</sup>                  | GST-Tev-mFAT3 (4185-4386)-hFAT3 (4421-4589)                                                                                                                                                                                                                                                                                                                                                                                                                    | Openbiosystems (clone # LIFESEQ720863) |
| GST-LRIG3 CT                                             | GST-Tev-hLRIG3 (841-1119)                                                                                                                                                                                                                                                                                                                                                                                                                                      | Openbiosystems (BC126171)              |

|                                         |                                                                         |                                          |
|-----------------------------------------|-------------------------------------------------------------------------|------------------------------------------|
| GST-ROBO1 CT                            | GST-Tev-hROBO1 (886-1078)                                               | Openbiosystems (BC115021)                |
| GST-Neuroigin-1 CT                      | GST-Tev-hNeuroigin-1 (725-840)                                          | Openbiosystems (BC032555)                |
| GST-Neuroigin-1 CT AA <sup>#3</sup>     | GST-Tev-hNeuroigin-1 (725-840), T816A/F817A                             | This study                               |
| NusA-Neuroigin-1 CT                     | NusA-Tev-hNeuroigin-1 (725-840)                                         | This study                               |
| NusA-Neuroigin-1 CT AA <sup>#3</sup>    | NusA-Tev-hNeuroigin-1 (725-840), T816A/F817A                            | This study                               |
| GST-Neuroigin-4X CT                     | GST-Tev-hNeuroigin-4X (721-817)                                         | This study (cDNA from Nils Brose)        |
| GST-Cav1.3 CT                           | GST-Tev-rCav1.3 (1914-2155)                                             | This study (Zhang et al., 2005)          |
| GST-BAI3 CT                             | GST-Tev-hBAI3 (1314-1502)                                               | This study (Bolliger et al., 2011)       |
| GST-mGluR5 CT                           | GST-Tev-rmGluR5 (912-1171)                                              | This study (Ronesi et al., 2012)         |
| GST-GluR6 CT                            | GST-Tev-rGluR6 (841-908)                                                | This study (Nasu-Nishimura et al., 2010) |
| GST-P2RX7 CT                            | GST-Tev-hP2RX76 (359-519)                                               | Openbiosystems (BC011913)                |
| CD16-7-hPCDH10 CT <sup>#7</sup>         | hCD16 (1-185)-hCD7 (146-203)-hPCDH10 (739-1040)-mCherry                 | This study (Blasutig et al., 2008)       |
| CD16-7-hPCDH10 CT AA <sup>#3,7</sup>    | hCD16 (1-185)-hCD7 (146-203)-hPCDH10 (739-1040, T1002A/F1003A)-mCherry  | This study (Blasutig et al., 2008)       |
| CD16-7-PCDH17 CT <sup>#7</sup>          | hCD16 (1-185)-hCD7 (146-203)-hPCDH17 (729-1159)-mCherry                 | This study (Blasutig et al., 2008)       |
| CD16-7-PCDH17 CT AA <sup>#3,7</sup>     | hCD16 (1-185)-hCD7 (146-203)-hPCDH17 (729-1159, T1000A/F1001A)-mCherry  | This study (Blasutig et al., 2008)       |
| CD16-7-neuroigin1 CT <sup>#7</sup>      | hCD16 (1-185)-hCD7 (146-203)-hNeuroigin1 (725-840)-mCherry              | This study (Blasutig et al., 2008)       |
| CD16-7-neuroigin1 CT AA <sup>#3,7</sup> | hCD16 (1-185)-hCD7 (146-203)-hNeuroigin1 (725-840, T816A/F817A)-mCherry | This study (Blasutig et al., 2008)       |
| Sra1-YPet <sup>#8</sup>                 | hSra1 (1-2353 full length)-(GGS)4-YPet                                  | This study                               |

Notes:

\* Protein species: h for human, m for mouse, r for rat and d for drosophila. All sequences were confirmed by DNA sequencing.

#1. To facilitate purification of full-length hWAVE1 from bacterial expression, a His<sub>6</sub> tag was inserted into the unstructured poly-proline region for the MBP-tagged full-length hWAVE1. This allowed double-affinity purification first by amylose beads and then by Ni NTA beads to remove degraded materials.

#2. Inserting or replacing an internal sequence was done using overlapping PCR.

#3. Point mutations were made using QuikChange (Stratagene).

#4. To facilitate cloning, an XhoI and a HindIII restriction site were introduced flanking the WIRS site using QuikChange, producing a variant containing G995L/A996E/A1008L. These mutations did not seem to affect the binding of the cytoplasmic tail to the WRC. To introduce desired mutations to the WIRS, paired DNA oligos were designed to contain the mutations and produce compatible ends for XhoI and HindIII when annealed to form double-stranded oligos. The annealed oligos were directly ligated into the XhoI/HindIII double-digested GST-PCDH10 CT variant.

#5. The commercial cDNA clone lacked the c-terminus of the cytoplasmic tail (4402-4555) and had an internal insertion of 33 amino acids (NASIVTVIQLVNNVVDSENEVSVMDQGQNYNR) between D4347 and A4349. The insertion does not contain a WIRS, and is conserved in the human FAT3 homologue, but not in rat. This construct contains both predicted WIRS motifs (Table S2).

#6. Two EST clones were assembled to generate a hybrid FAT3 full-length cytoplasmic tail containing 4185-4386 of mFAT3 and 4421-4589 of hFAT3 by overlapping PCR. The human FAT3 (4421-4589) sequence is 88% identical to the mouse FAT3.

#7. These vectors were modified from the pEGFP-N1 vector (Clontech). First the EGFP coding sequence was replaced by mCherry or YPet sequence between the BamHI and NotI sites. The CD16-CD7 coding sequence (Blasutig et al., 2008) was then inserted between NheI and XhoI of the new mCherry N1 vector. The coding sequences of different cytoplasmic tails were then subcloned in frame between XhoI and BamHI.

#8. First the pEGFP-N1 vector (Clontech) was modified by replacing the EGFP coding sequence with the YPet sequence between BamHI and NotI, with a (GGG)<sub>4</sub> linker inserted in frame following the BamHI site. The hSra1 coding sequence was then subcloned between XhoI and SacII. The resulting fusion coding sequence for hSra1-(GGG)<sub>4</sub>-YPet was subcloned into the pGC-IRES vector (Costa et al., 2000) by replacing the sequences between two BamHI sites using the SLIC method (Li and Elledge, 2007).
